# Supplementary material for: Mortality and Major Adverse Cardiac Events in Patients With Breast Cancer Receiving Radiotherapy: The First Decade
Source: PubMed Central journal article supplement — J Am Heart Assoc. 2023 Apr 7;12(8):e027855. doi: 10.1161/JAHA.122.027855 (PMC10227262; doi:10.1161/jaha.122.027855), 2023-04-07

# **SUPPLEMENTAL MATERIAL**

**Table S1. Variables used to study predictors of adverse events.**

|                                              |
|----------------------------------------------|
| <b><u>Variables</u></b>                      |
| Age, years                                   |
| <b>Tumor characteristics</b>                 |
| Left versus right-sided breast cancer        |
| Tumor size (1-4, unknown)                    |
| Nodal status (0-3, unknown)                  |
| Tumor Stage (I-IV, unknown)                  |
| Tumor Grade (1-3, unknown)                   |
| Estrogen receptor positive                   |
| Progesterone receptor positive               |
| HER2 receptor positive                       |
| <b>Treatment characteristics</b>             |
| Treatment Setting (neoadjuvant vs. adjuvant) |
| Irradiation mediastinal and subclavian nodes |
| Mean heart dose                              |
| Treatment with hormonal therapy              |
| Treatment with chemotherapy                  |
| Treatment with HER2 inhibitors               |
| <b>Cardiovascular risk factors</b>           |
| History of cardiovascular disease            |
| Mayo Clinic Risk Score                       |

HER2: human epidermal growth factor receptor 2.

**Table S2. proportional hazard assumption Cox multivariable models.**

|                                              | Overall mortality |          | MACE         |          | AF           |          | HF           |          |
|----------------------------------------------|-------------------|----------|--------------|----------|--------------|----------|--------------|----------|
| <b>Tumor characteristics</b>                 | <b>Chisq</b>      | <b>p</b> | <b>Chisq</b> | <b>p</b> | <b>Chisq</b> | <b>p</b> | <b>Chisq</b> | <b>p</b> |
| Left versus right-sided breast cancer        | 0.768             | 0.381    | 0.006        | 0.938    | -            | -        | -            | -        |
| Tumor size                                   | <0.001            | 0.987    | 0.026        | 0.871    | -            | -        | 1.202        | 0.27     |
| Nodal status                                 | 0.031             | 0.861    | 0.129        | 0.719    | 0.003        | 0.96     | 0.163        | 0.69     |
| Tumor Stage                                  | 0.227             | 0.633    | 0.004        | 0.949    | 0.006        | 0.94     | 0.005        | 0.94     |
| Tumor Grade                                  | 2.848             | 0.091    | 0.123        | 0.725    | -            | -        | 2.508        | 0.11     |
| Estrogen receptor positive                   | 4.650             | 0.031    | 0.230        | 0.512    | -            | -        | -            | -        |
| Progesterone receptor positive               | 1.906             | 0.167    | 1.867        | 0.172    | -            | -        | -            | -        |
| HER2 receptor positive                       | 0.709             | 0.400    | 1.790        | 0.181    | -            | -        | -            | -        |
|                                              |                   |          |              |          |              |          |              |          |
| <b>Treatment characteristics</b>             |                   |          |              |          |              |          |              |          |
| Treatment Setting (neoadjuvant vs. adjuvant) | 0.367             | 0.545    | 1.371        | 0.242    | 0.036        | 0.85     | -            | -        |
| Irradiation mediastinal and subclavian nodes | 0.118             | 0.732    | 3.040        | 0.081    | -            | -        | -            | -        |
| Mean heart dose                              | 1.503             | 0.220    | 2.177        | 0.140    | 0.008        | 0.93     | 0.881        | 0.35     |

|                                    |       |       |       |       |       |      |       |      |
|------------------------------------|-------|-------|-------|-------|-------|------|-------|------|
| Treatment with hormonal therapy    | -     | -     | -     | -     | -     | -    | -     | -    |
| Treatment with chemotherapy        | 0.416 | 0.519 | 0.136 | 0.713 | -     | -    | -     | -    |
| Treatment with HER2 inhibitors     | 0.300 | 0.584 | 1.935 | 0.164 | -     | -    | -     | -    |
|                                    |       |       |       |       |       |      |       |      |
| <b>Cardiovascular risk factors</b> |       |       |       |       |       |      |       |      |
| History of cardiovascular disease  | 0.258 | 0.612 | 0.001 | 0.969 | 0.322 | 0.57 | 0.287 | 0.59 |
| Mayo Clinic Risk Score             | 0.045 | 0.832 | 0.422 | 0.516 | -     | -    | 0.100 | 0.75 |

HER2: human epidermal growth factor receptor 2; MACE: Major Adverse Cardiac Event, AF: Atrial Fibrillation/Flutter; HF: Heart Failure; Chisq: chi-squared test.

**Table S3. Univariable and multivariable Cox regression for overall survival of 1095 patients with unilateral breast cancer treated with radiation therapy in 2007 or 2008.**

|                                              | <b>Univariable</b>           |                | <b>Multivariable</b>         |                |
|----------------------------------------------|------------------------------|----------------|------------------------------|----------------|
| <b>Tumor characteristics</b>                 | <b>Hazard Ratio (95% CI)</b> | <b>p value</b> | <b>Hazard Ratio (95% CI)</b> | <b>p value</b> |
| Left or right-sided breast cancer            | 1.055 (0.809 – 1.376)        | 0.694          | 0.881 (0.561 – 1.385)        | 0.584          |
| Tumor size                                   | 1.574 (1.365 – 1.814)        | <0.001         | 0.722 (0.455 – 1.171)        | 0.187          |
| Nodal status                                 | 1.567 (1.367 – 1.797)        | <0.001         | 1.237 (0.866 – 1.767)        | 0.242          |
| Tumor Stage                                  | 1.796 (1.494 – 2.159)        | <0.001         | 1.370 (0.715 – 2.627)        | 0.343          |
| Tumor Grade                                  | 1.508 (1.235 – 1.841)        | <0.001         | 1.739 (1.166 - 2.591)        | 0.007          |
| Estrogen receptor positive                   | 0.557 (0.407 – 0.762)        | <0.001         | 0.854 (0.410 – 1.780)        | 0.674          |
| Progesterone receptor positive               | 0.603 (0.455 – 0.799)        | <0.001         | 0.591 (0.322 – 1.084)        | 0.89           |
| HER2 receptor positive                       | 0.695 (0.434 – 1.114)        | 0.130          | 0.921 (0.219 – 3.862)        | 0.910          |
|                                              |                              |                |                              |                |
| <b>Treatment characteristics</b>             |                              |                |                              |                |
| Treatment Setting (neoadjuvant vs. adjuvant) | 2.611 (1.856 – 3.672)        | <0.001         | 2.782 (1.304 – 5.936)        | 0.008          |
| Irradiation mediastinal and subclavian nodes | 0.916 (0.686 – 1.223)        | 0.553          | 0.764 (0.224 - 2.616)        | 0.669          |

|                                    |                       |        |                       |       |
|------------------------------------|-----------------------|--------|-----------------------|-------|
| Mean heart dose                    | 1.049 (1.003 – 1.098) | 0.037  | 1.048 (0.996 – 1.103) | 0.072 |
| Treatment with hormonal therapy    | 0.518 (0.382 – 0.702) | <0.001 | -                     | -     |
| Treatment with chemotherapy        | 1.134 (0.863 – 1.489) | 0.366  | 0.702 (0.151 – 3.264) | 0.651 |
| Treatment with HER2 inhibitors     | 0.512 (0.292 – 0.897) | 0.019  | 0.404 (0.082 – 1.981) | 0.264 |
|                                    |                       |        |                       |       |
| <b>Cardiovascular risk factors</b> |                       |        |                       |       |
| History of cardiovascular disease  | 2.666 (1.792 – 3.965) | <0.001 | 1.182 (0.547 – 2.554) | 0.670 |
| Mayo Clinic Risk Score             | 1.101 (1.027 – 1.180) | 0.006  | 1.116 (0.772 - 1.614) | 0.559 |

CI: confidence interval; HER2: human epidermal growth factor receptor 2.

**Table S4. Univariable and multivariable Cox regression for major adverse cardiac events in 1095 patients with unilateral breast cancer treated with radiation therapy in 2007 or 2008.**

|                                              | <b>Univariable</b>           |                | <b>Multivariable</b>         |                |
|----------------------------------------------|------------------------------|----------------|------------------------------|----------------|
| <b>Tumor characteristics</b>                 | <b>Hazard Ratio (95% CI)</b> | <b>p value</b> | <b>Hazard Ratio (95% CI)</b> | <b>p value</b> |
| Left or right-sided breast cancer            | 1.036 (0.723 – 1.485)        | 0.847          | 0.775 (0.428 – 1.404)        | 0.401          |
| Tumor Size                                   | 1.304 (1.064 – 1.598)        | 0.010          | 0.847 (0.432 – 1.661)        | 0.629          |
| Nodal Status                                 | 1.281 (1.051 – 1.561)        | 0.014          | 1.594 (0.937 – 2.710)        | 0.085          |
| Tumor Stage                                  | 1.325 (1.034 – 1.697)        | 0.026          | 0.788 (0.322 – 1.931)        | 0.603          |
| Tumor Grade                                  | 1.111 (0.861 – 1.433)        | 0.419          | 1.306 (0.811 – 2.103)        | 0.273          |
| Estrogen receptor positive                   | 1.461 (0.834 – 2.559)        | 0.185          | 2.053 (0.533 – 7.904)        | 0.296          |
| Progesterone receptor positive               | 1.072 (0.703 – 1.633)        | 0.747          | 1.891 (0.741 – 4.829)        | 0.183          |
| HER2 receptor positive                       | 0.567 (0.287 – 1.120)        | 0.103          | 0.098 (0.002 – 6.248)        | 0.273          |
|                                              |                              |                |                              |                |
| <b>Treatment characteristics</b>             |                              |                |                              |                |
| Treatment Setting (neoadjuvant vs. adjuvant) | 1.283 (0.721 – 2.284)        | 0.397          | 2.754 (0.815 – 9.306)        | 0.103          |

|                                              |                        |        |                        |       |
|----------------------------------------------|------------------------|--------|------------------------|-------|
| Irradiation mediastinal and subclavian nodes | 1.261 (0.830 – 1.917)  | 0.277  | 0.379 (0.082 – 1.747)  | 0.214 |
| Mean heart dose                              | 1.087 (1.029 – 1.148)  | 0.003  | 1.093 (1.024 – 1.167)  | 0.007 |
| Treatment with hormonal therapy              | 1.521 (0.868 – 2.664)  | 0.142  | -                      | -     |
| Treatment with chemotherapy                  | 0.797 (0.548 – 1.159)  | 0.236  | 0.062 (0.008 – 0.484)  | 0.007 |
| Treatment with HER2 inhibitors               | 0.404 (0.178 – 0.919)  | 0.031  | 0.880 (0.013 – 58.724) | 0.952 |
|                                              |                        |        |                        |       |
| <b>Cardiovascular risk factors</b>           |                        |        |                        |       |
| History of cardiovascular disease            | 6.928 (4.494 – 10.681) | <0.001 | 2.386 (1.096 – 5.197)  | 0.029 |
| Mayo Clinic Risk Score                       | 1.035 (0.942 – 1.138)  | 0.471  | 2.664 (1.625 – 4.367)  | 0.001 |

CI: confidence interval; HER2: human epidermal growth factor receptor 2.



**Table S5. Mortality and cardiovascular event rates in 1095 patients treated for left-sided versus right-sided breast cancer.**

| Endpoint                             | Left (n=551)     |                  | Right (n=544)    |                  | Rate ratio<br>(95% CI) |
|--------------------------------------|------------------|------------------|------------------|------------------|------------------------|
|                                      | Number of events | Rate (95% CI)    | Number of events | Rate (95% CI)    |                        |
| All-cause mortality                  | 107              | 20.4 (16.6-24.2) | 111              | 21.5 (17.5-25.4) | 0.95 (0.73-1.24)       |
| CV mortality                         | 10               | 1.9 (0.7-3.1)    | 12               | 2.3 (1.0-3.6)    | 0.82 (0.36-1.90)       |
| Non-CV mortality                     | 97               | 18.5 (14.8-22.1) | 99               | 19.1 (15.4-22.9) | 0.97 (0.73-1.27)       |
| Cancer mortality                     | 53               | 10.1 (7.4-12.8)  | 54               | 10.4 (7.7-13.2)  | 0.97 (0.66-1.41)       |
| Fatal + non-fatal coronary endpoints | 18               | 3.5 (1.9-5.0)    | 12               | 2.3 (1.0-3.7)    | 1.47 (0.71-3.05)       |
| Fatal heart failure                  | 4                | 0.8 (0.0-1.5)    | 4                | 0.8 (0.0-1.5)    | 0.99 (0.25-3.94)       |
| Non-fatal heart failure              | 23               | 4.5 (2.6-6.3)    | 28               | 5.6 (3.5-7.6)    | 0.80 (0.46-1.40)       |
| Fatal + non-fatal heart failure      | 26               | 5.0 (3.1-7.0)    | 30               | 5.9 (3.8-8.0)    | 0.85 (0.51-1.44)       |
| Atrial fibrillation                  | 22               | 6.2 (3.6-8.7)    | 19               | 5.6 (3.1-8.0)    | 1.11 (0.60-2.05)       |

About half of the patients (n=551, 50.3%) had left-sided breast cancer. Mean age and the prevalences of smoking, diabetes and hypertension were similar ( $P>0.27$ ) among patients with left-sided and right-sided breast cancer (age:  $57.6 \pm 12.0$  vs  $56.8 \pm 12.6$  years, ever smoking: 31.9% vs 29.6%, hypertension: 28.7% vs 29.4%, diabetes: 6.2% vs 6.2%). Incidence of endpoints according to the localization of the cancer:

Rates are expressed as number of events per 1000 subject years.

CI: confidence interval; CV: cardiovascular.

**Table S6. Mortality and cardiovascular event rates in 1088 breast cancer patients by anthracycline chemotherapy treatment.**

|                                                | Anthracycline CTX (n=514) |                  | No anthracycline CTX (n=574) |                  |                     |
|------------------------------------------------|---------------------------|------------------|------------------------------|------------------|---------------------|
| Endpoint                                       | Number of events          | Rate (95% CI)    | Number of events             | Rate (95% CI)    | Rate ratio (95% CI) |
| All-cause mortality                            | 99                        | 20.6 (16.6-24.6) | 118                          | 21.3 (17.5-25.1) | 0.96 (0.74-1.26)    |
| CV mortality                                   | 5                         | 1.0 (0.1-1.9)    | 17                           | 3.1 (1.6-4.5)    | 0.34 (0.12-0.92)    |
| Non-CV mortality                               | 94                        | 19.5 (15.6-23.4) | 101                          | 18.3 (14.7-21.8) | 1.07 (0.81-1.41)    |
| Cancer mortality                               | 68                        | 14.1 (10.8-17.5) | 39                           | 7.0 (4.8-9.3)    | 2.00 (1.35-2.97)    |
| Fatal + non-fatal coronary endpoints           | 9                         | 1.9 (0.7-3.1)    | 21                           | 3.8 (2.2-5.5)    | 0.49 (0.23-1.07)    |
| Fatal heart failure                            | 4                         | 0.8 (0.0-1.6)    | 4                            | 0.7 (0.0-1.4)    | 1.15 (0.29-4.60)    |
| Non-fatal heart failure                        | 25                        | 5.3 (3.2-7.4)    | 26                           | 4.8 (3.0-6.6)    | 1.11 (0.64-1.92)    |
| Fatal + non-fatal heart failure                | 28                        | 5.9 (3.7-8.1)    | 28                           | 5.1 (3.2-7.0)    | 1.16 (0.69-1.96)    |
| All fatal + non-fatal cardiovascular endpoints | 37                        | 7.9 (5.4-10.5)   | 59                           | 11.0 (8.2-13.8)  | 0.72 (0.48-1.09)    |

|                     | Anthracycline CTX (n=514) |               | No anthracycline CTX (n=574) |                |                     |
|---------------------|---------------------------|---------------|------------------------------|----------------|---------------------|
| Endpoint            | Number of events          | Rate (95% CI) | Number of events             | Rate (95% CI)  | Rate ratio (95% CI) |
| Atrial fibrillation | 10                        | 3.5 (1.3-5.7) | 31                           | 7.6 (4.9-10.2) | 0.46 (0.23-0.94)    |

For this analysis 7 patients were excluded because of missing information on anthracycline chemotherapy treatment. Of the remaining 1088 patients, 514 (47.2%) received anthracycline chemotherapy (CTX). Event rates in patients receiving/not receiving anthracycline CTX are as follows:

Rates are expressed as number of events per 1000 subject years.

CI: confidence interval; CV: cardiovascular; CTX: chemotherapy.

**Table S7. Univariable and multivariable Cox regression for atrial fibrillation or flutter in 1095 patients with unilateral breast cancer treated with radiation therapy in 2007 or 2008.**

|                                              | <b>Univariable</b>           |                | <b>Multivariable</b>         |                |
|----------------------------------------------|------------------------------|----------------|------------------------------|----------------|
| <b>Tumor characteristics</b>                 | <b>Hazard Ratio (95% CI)</b> | <b>p value</b> | <b>Hazard Ratio (95% CI)</b> | <b>p value</b> |
| Left or right-sided breast cancer            | 0.821 (0.448 – 1.501)        | 0.521          | -                            | -              |
| Tumor size                                   | 1.383 (0.993 – 1.928)        | 0.055          | -                            | -              |
| Nodal status                                 | 1.794 (1.341 – 2.402)        | <0.001         | 1.765 (0.717 – 4.344)        | 0.216          |
| Tumor Stage                                  | 1.937 (1.274 – 2.944)        | 0.002          | 0.973 (0.258 – 3.671)        | 0.968          |
| Tumor Grade                                  | 0.819 (0.544 – 1.226)        | 0.329          | -                            | -              |
| Estrogen receptor positive                   | 2.220 (0.685 – 7.192)        | 0.183          | -                            | -              |
| Progesterone receptor positive               | 1.198 (0.573 – 2.507)        | 0.631          | -                            | -              |
| HER2 receptor positive                       | 0.338 (0.082 – 1.400)        | 0.135          | -                            | -              |
|                                              |                              |                |                              |                |
| <b>Treatment characteristics</b>             |                              |                |                              |                |
| Treatment Setting (neoadjuvant vs. adjuvant) | 2.397 (1.063 – 5.408)        | 0.035          | 3.032 (0.510 – 18.020)       | 0.223          |

|                                              |                       |       |                       |       |
|----------------------------------------------|-----------------------|-------|-----------------------|-------|
| Irradiation mediastinal and subclavian nodes | 0.932 (0.478 – 1.827) | 0.836 | -                     | -     |
| Mean heart dose                              | 1.163 (1.057 – 1.281) | 0.002 | 1.113 (0.999 – 1.240) | 0.053 |
| Treatment with hormonal therapy              | 2.368 (0.731 – 7.669) | 0.150 | -                     | -     |
| Treatment with chemotherapy                  | 0.737 (0.385 – 1.412) | 0.291 | -                     | -     |
| Treatment with HER2 inhibitors               | 0.189 (0.026 – 1.378) | 0.100 | -                     | -     |
|                                              |                       |       |                       |       |
| <b>Cardiovascular risk factors</b>           |                       |       |                       |       |
| History of cardiovascular disease            | 3.366 (1.528 – 7.417) | 0.003 | 1.783 (0.351 – 9.064) | 0.486 |
| Mayo Clinic Risk Score                       | 1.007 (0.862 – 1.177) | 0.928 | -                     | -     |

CI: confidence interval; HER2: human epidermal growth factor receptor 2.

**Table S8. Univariable and multivariable Cox regression for heart failure in 1095 patients with unilateral breast cancer treated with radiation therapy in 2007 or 2008.**

|                                              | <b>Univariable</b>           |                | <b>Multivariable</b>         |                |
|----------------------------------------------|------------------------------|----------------|------------------------------|----------------|
| <b>Tumor characteristics</b>                 | <b>Hazard Ratio (95% CI)</b> | <b>p value</b> | <b>Hazard Ratio (95% CI)</b> | <b>p value</b> |
| Left or right-sided breast cancer            | 1.037 (0.621 – 1.730)        | 0.890          | -                            | -              |
| Tumor size                                   | 1.607 (1.221 – 2.116)        | 0.001          | 0.611 (0.239 – 1.564)        | 0.304          |
| Nodal status                                 | 1.466 (1.133 – 1.896)        | 0.004          | 1.460 (0.736 – 2.895)        | 0.279          |
| Tumor Stage                                  | 1.777 (1.248 – 2.531)        | 0.001          | 1.134 (0.388 – 4.445)        | 0.661          |
| Tumor Grade                                  | 1.531 (1.046 – 2.240)        | 0.028          | 1.936 (0.955 – 3.924)        | 0.067          |
| Estrogen receptor positive                   | 0.781 (0.401 – 1.524)        | 0.469          | -                            | -              |
| Progesterone receptor positive               | 0.929 (0.516 – 1.673)        | 0.807          | -                            | -              |
| HER2 receptor positive                       | 0.659 (0.263 – 1.652)        | 0.373          | -                            | -              |
|                                              |                              |                |                              |                |
| <b>Treatment characteristics</b>             |                              |                |                              |                |
| Treatment Setting (neoadjuvant vs. adjuvant) | 1.435 (0.648 – 3.177)        | 0.373          | -                            | -              |

|                                              |                       |        |                        |       |
|----------------------------------------------|-----------------------|--------|------------------------|-------|
| Irradiation mediastinal and subclavian nodes | 1.013 (0.537 – 1.910) | 0.968  | -                      | -     |
| Mean heart dose                              | 1.134 (1.030 – 1.248) | 0.010  | 1.100 (0.978 – 1.237)  | 0.113 |
| Treatment with hormonal therapy              | 0.854 (0.438 – 1.664) | 0.642  | -                      | -     |
| Treatment with chemotherapy                  | 1.267 (0.749 – 2.144) | 0.377  | -                      | -     |
| Treatment with HER2 inhibitors               | 0.611 (0.220 – 1.692) | 0.343  | -                      | -     |
|                                              |                       |        |                        |       |
| <b>Cardiovascular risk factors</b>           |                       |        |                        |       |
| History of cardiovascular disease            | 5.511 (3.090 – 9.831) | <0.001 | 3.205 (1.006 – 10.208) | 0.049 |
| Mayo Clinic Risk Score                       | 1.166 (1.020 – 1.334) | 0.025  | 1.305 (0.980 – 1.738)  | 0.069 |

CI: confidence interval; HER2: human epidermal growth factor receptor 2.



**Figure S1. Mayo Clinic Risk Score.**

| 1. Risk assessment                                                                                                                                                                                                                                                                                                                                                                                                                                                                                                                                                                                                                                                 |                                                                                                                                                                                                                                                                                                                                                                                | Tests: TTE with strain, EKG, cTn                                                       |
|--------------------------------------------------------------------------------------------------------------------------------------------------------------------------------------------------------------------------------------------------------------------------------------------------------------------------------------------------------------------------------------------------------------------------------------------------------------------------------------------------------------------------------------------------------------------------------------------------------------------------------------------------------------------|--------------------------------------------------------------------------------------------------------------------------------------------------------------------------------------------------------------------------------------------------------------------------------------------------------------------------------------------------------------------------------|----------------------------------------------------------------------------------------|
| <p><b>Medication-related risk</b></p> <p><b>High (risk score 4):</b><br/>Anthracyclines, Cyclophosphamide, Ifosfamide, Clofarabine, Herceptin</p> <p><b>Intermediate (risk score 2):</b><br/>Docetaxel, Pertuzumab, Sunitinib, Sorafenib</p> <p><b>Low (risk score 1):</b><br/>Bevacizumab, Dasatinib, Imatinib, Lapatinib</p> <p><b>Rare (risk score 0):</b><br/>For example, Etoposide, Rituximab, Thalidomide</p>                                                                                                                                                                                                                                               | <p><b>Patient-related risk factors</b></p> <ul style="list-style-type: none"> <li>• Cardiomyopathy or heart failure</li> <li>• CAD or equivalent (incl. PAD)</li> <li>• HTN</li> <li>• Diabetes mellitus</li> <li>• Prior or concurrent anthracycline</li> <li>• Prior or concurrent chest radiation</li> <li>• Age &lt;15 or &gt;65 years</li> <li>• Female gender</li> </ul> |                                                                                        |
| <p><b>Overall risk by Cardiotoxicity Risk Score (CRS)</b><br/>(risk categories by drug-related risk score plus number of patient-related risk factors:<br/>CRS &gt;6: very high, 5-6: high, 3-4: intermediate, 1-2: low, 0: very low)</p>                                                                                                                                                                                                                                                                                                                                                                                                                          |                                                                                                                                                                                                                                                                                                                                                                                |                                                                                        |
| 2. Monitoring recommendations                                                                                                                                                                                                                                                                                                                                                                                                                                                                                                                                                                                                                                      |                                                                                                                                                                                                                                                                                                                                                                                |                                                                                        |
| <p><b>Very high cardiotoxicity risk:</b> TTE with strain before every (other) cycle, end, 3-6 months and 1 year, optional ECG, cTn with TTE during chemotherapy</p> <p><b>High cardiotoxicity risk:</b> TTE with strain every 3 cycles, end, 3-6 months and 1 year after chemotherapy, optional ECG, cTn with TTE during chemotherapy</p> <p><b>Intermediate cardiotoxicity risk:</b> TTE with strain, mid-term, end and 3-6 months after chemotherapy, optional ECG, cTn mid-term of chemotherapy</p> <p><b>Low cardiotoxicity risk:</b> Optional TTE with strain and/or ECG, cTn at the end of chemotherapy</p> <p><b>Very low cardiotoxicity risk:</b> None</p> |                                                                                                                                                                                                                                                                                                                                                                                |                                                                                        |
| 3. Management recommendations                                                                                                                                                                                                                                                                                                                                                                                                                                                                                                                                                                                                                                      |                                                                                                                                                                                                                                                                                                                                                                                | Applies as preventive measures before and with abnormalities during/after chemotherapy |
| <p><b>Very high cardiotoxicity risk:</b> Initiate ACE-I/ARB, Carvedilol, and statins, starting at lowest dose and start chemotherapy in 1 week from initiation to allow steady state, up-titrate as tolerated</p> <p><b>High cardiotoxicity risk:</b> Initiate ACE-I/ARB, Carvedilol, and/or statins</p> <p><b>Intermediate cardiotoxicity risk:</b> Discuss risk and benefit of medications</p> <p><b>Low cardiotoxicity risk:</b> None, monitoring only</p> <p><b>Very low cardiotoxicity risk:</b> None, monitoring only</p>                                                                                                                                    |                                                                                                                                                                                                                                                                                                                                                                                |                                                                                        |

**Figure S2. Subgroups radiation therapy.**

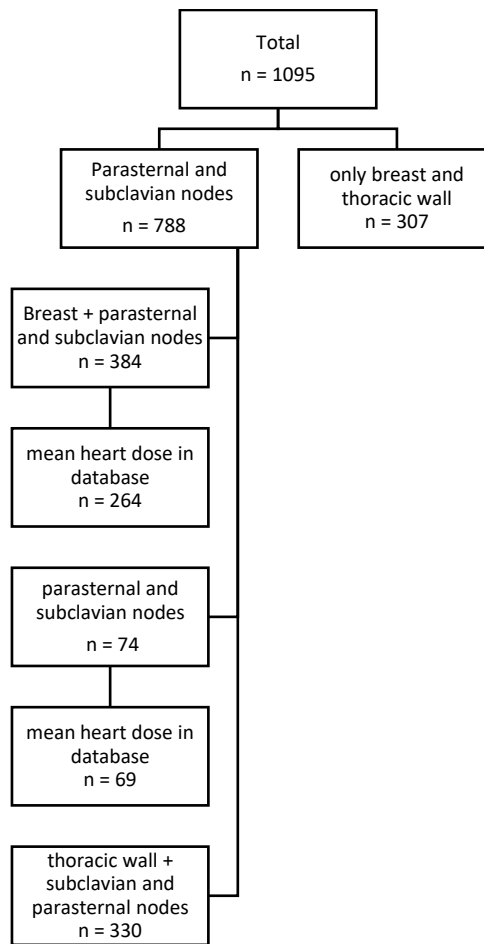

**Figure S3. Matching.**

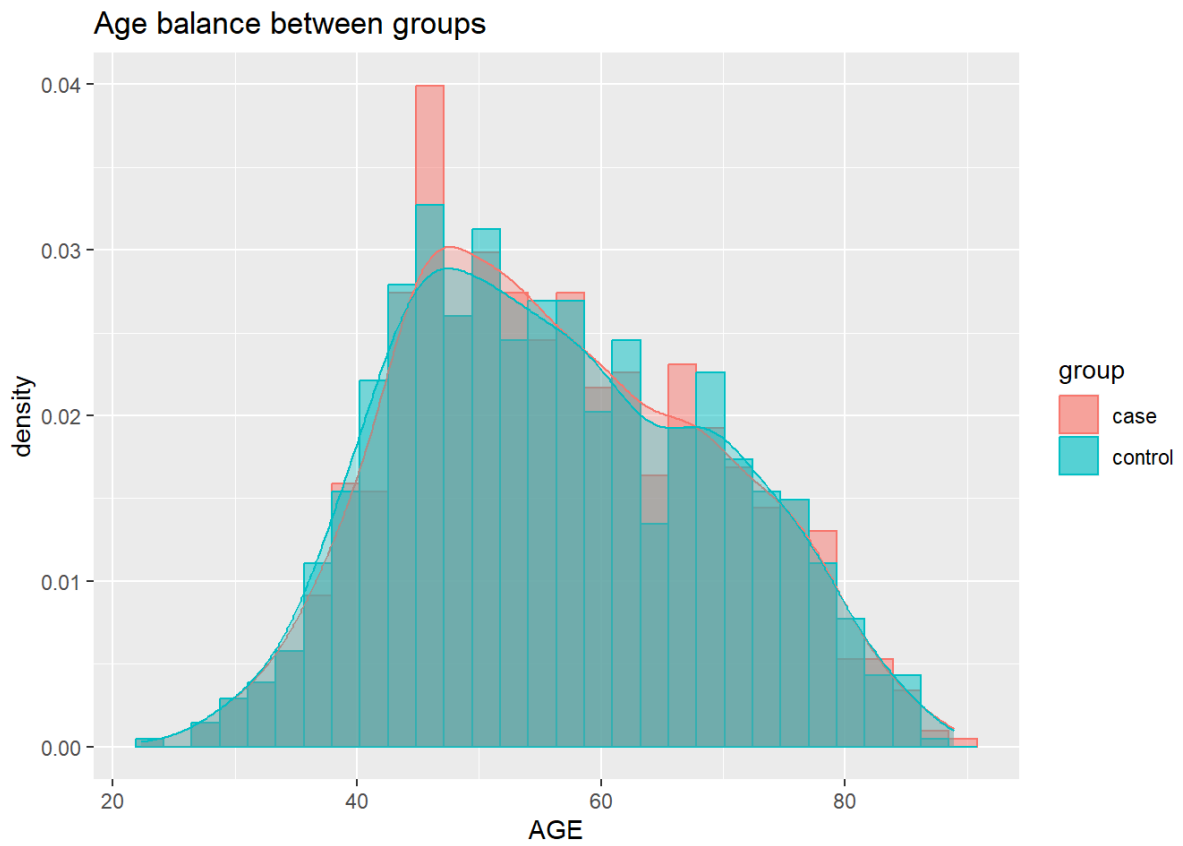

| <u>Variables</u>    | <u>Cases</u> | <u>Controls</u> |
|---------------------|--------------|-----------------|
| <b>Smoking</b>      |              |                 |
| No                  | 586          | 586             |
| Yes                 | 318          | 318             |
| <b>Hypertension</b> |              |                 |
| No                  | 588          | 588             |
| Yes                 | 316          | 316             |
| <b>Diabetes</b>     |              |                 |
| No                  | 843          | 843             |
| Yes                 | 61           | 61              |

**Figure S4. coefficient (natural log of the hazard ratio) over time of Estrogen Receptor Positivity in Cox multivariable model of mortality.**

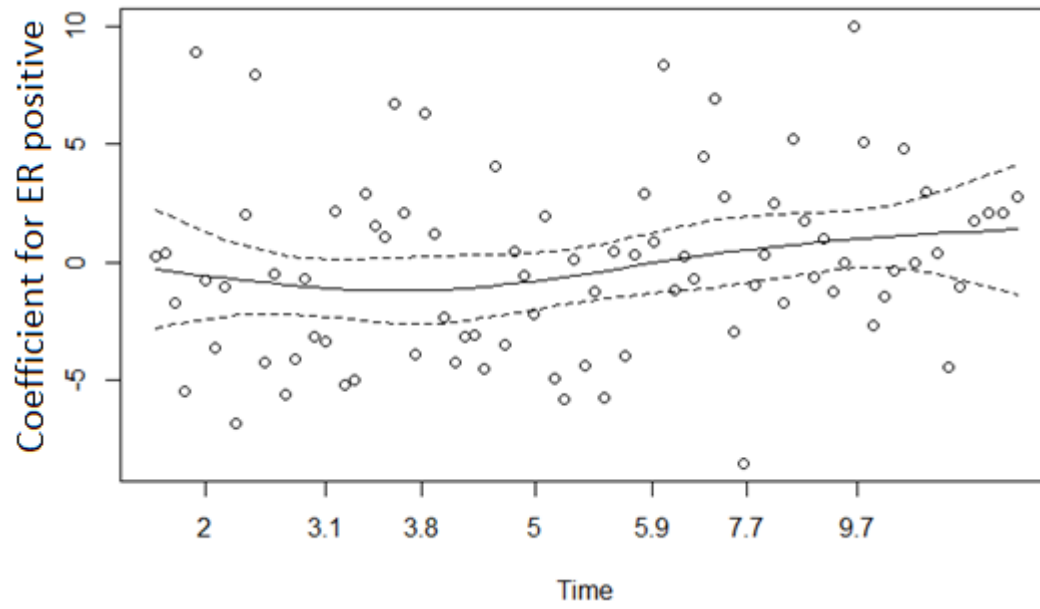

Supplement: JAH3-12-e027855-s001.pdf [file JAH3-12-e027855-s001.pdf]
